# Supplementary material for: Linalool-Incorporated Nanoparticles as a Novel Anticancer Agent for Epithelial Ovarian Carcinoma
Source: Oxford University Press journal article supplement (doi:10.1158/1535-7163.mct-15-0733-t), 2016-02-09
Supplement: 15357163mct150733t-sup-155075_2_supp_3311928_l0zjtl.docx [file 15357163mct150733t-sup-155075_2_supp_3311928_l0zjtl.docx]

**Linalool-incorporated nanoparticles as a novel anticancer agent for epithelial ovarian carcinoma**

Hee Dong Han1, Young-Jae Cho2,3, Sung Keun Cho4, Yeongseon Byeon1, Hat Nim Jeon1, Hye-Sun Kim5, Byoung-Gie Kim2, Duk-Soo Bae2, Gabriel Lopez-Berestein6,8,9, Anil K. Sood7,8,9, Byung Cheol Shin4, Yeong-Min Park1, andJeong-Won Lee2,3

**Supplementary Fig. 1**


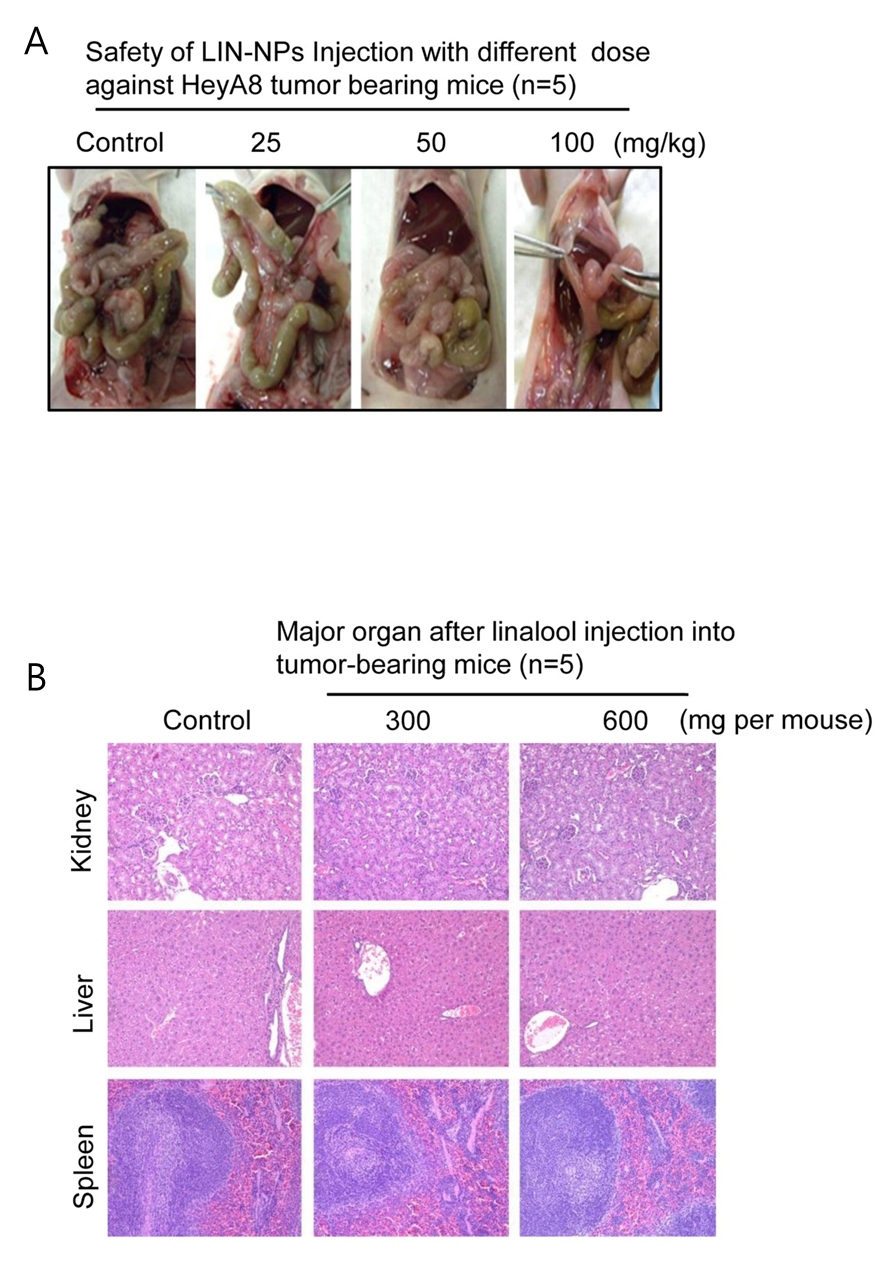


Supplementary Figure 1. Safety and toxicity in mouse after treatment of linalool with different dose.
